# Supplementary material for: A flexible metal nano-mesh strain sensor with the characteristic of spontaneous functional recovery after fracture damage
Source: Royal Society of Chemistry journal article supplement (doi:10.1039/d2nr02493d), 2022-01-01
Supplement: d2nr02493d1.pdf [file d2nr02493d1.pdf]

## Supporting Information

### Flexible Metal Nano-mesh Strain Sensor with Characteristics of Spontaneous Functional Recovery after Fracture Damage

Dongyang Zhao,<sup>‡a</sup> Bangbang Nie,<sup>‡a</sup> Guochen Qi,<sup>a</sup> Shijiao Li,<sup>a</sup> Qichen Zhu,<sup>a</sup> Jingjiang Qiu,<sup>a b</sup> Yanya Hsu,<sup>a</sup>

Yudong Zhang,<sup>a</sup> Wen Wang,<sup>a</sup> Qidong Zhang<sup>c</sup> and Zonhan Wei\*<sup>a b d</sup>

<sup>a</sup> School of Mechanics and Safety Engineering, Zhengzhou University, Zhengzhou 450001, China.

<sup>b</sup> Institute of Intelligent Sensing, Zhengzhou University, Zhengzhou 450001, China.

<sup>c</sup> Zhengzhou Tobacco Research Institute of CNTC, Zhengzhou 450001, China.

<sup>d</sup> School of Cyber Science and Engineering & Hanwei Institute of Internet of Things,

Zhengzhou University, Zhengzhou 450001, China.

\*Correspondence to: [prof.wei@outlook.com](mailto:prof.wei@outlook.com)

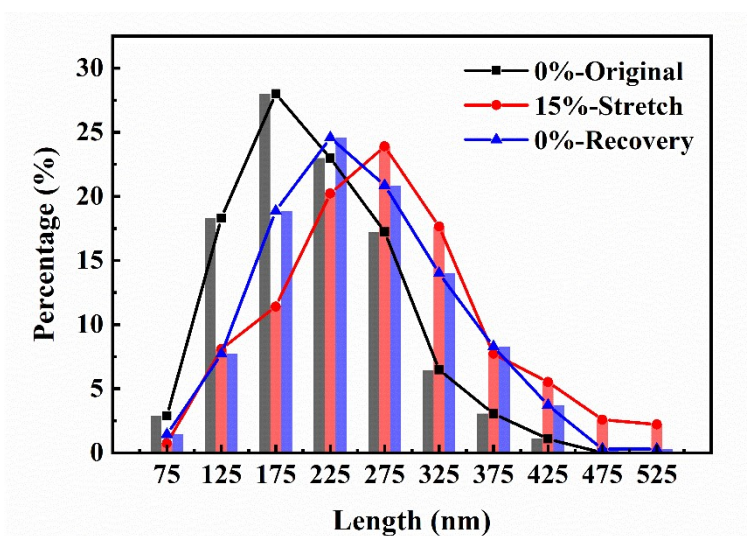

Fig. S1 Nanowire lengths in the original, stretched (15%), and recovered states.

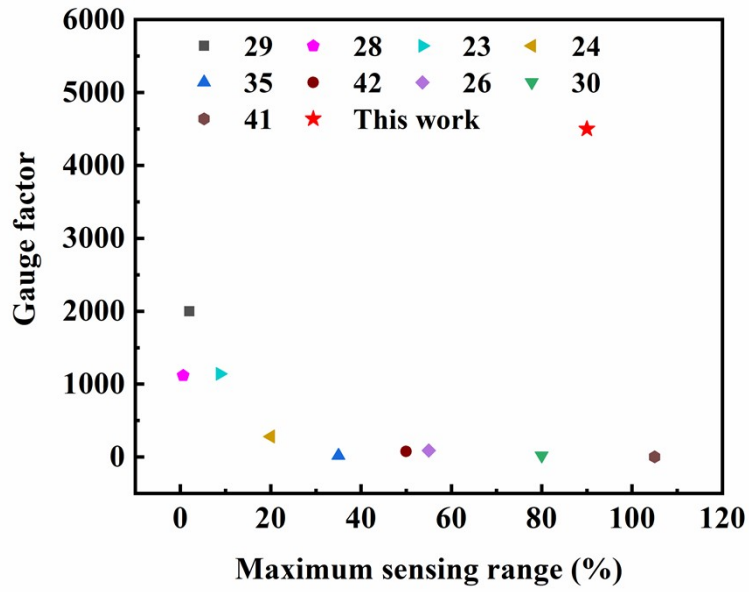

**Fig. S2** Comparison of the gauge factor and maximum sensing range of this work with other strain sensors.

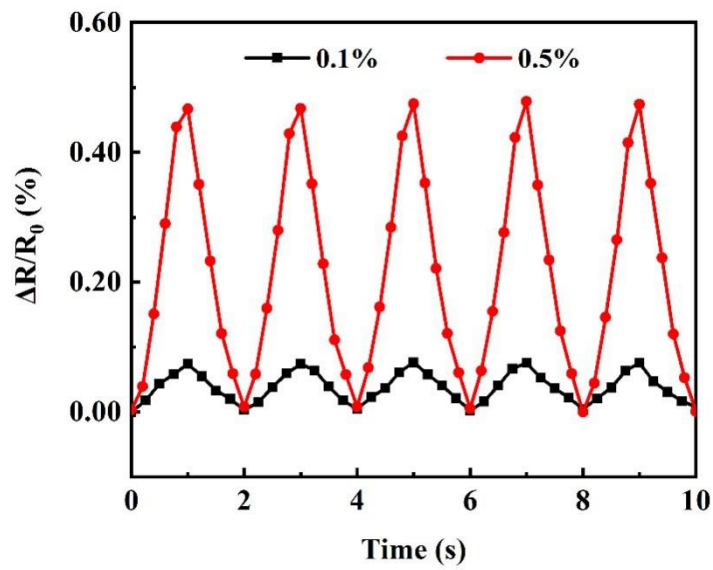

**Fig. S3** Fast response of the sensor to cyclic loadings at small strains (0.1% and 0.5%).

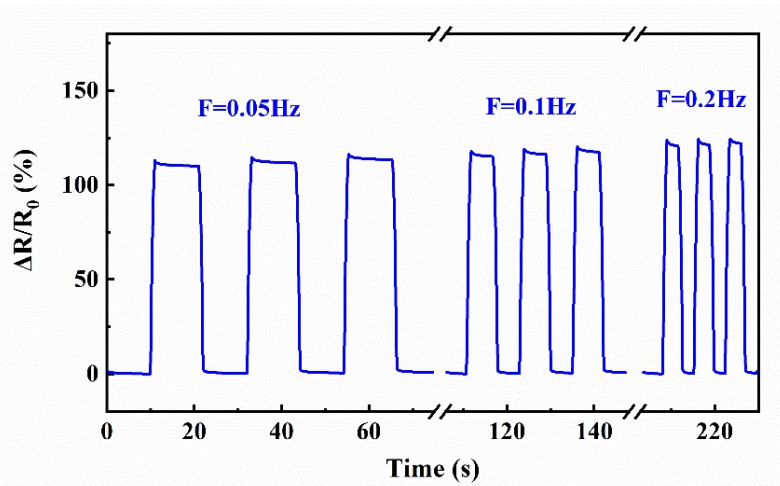

Fig. S4 Time-dependent response of  $\Delta R/R_0$  at different frequencies.

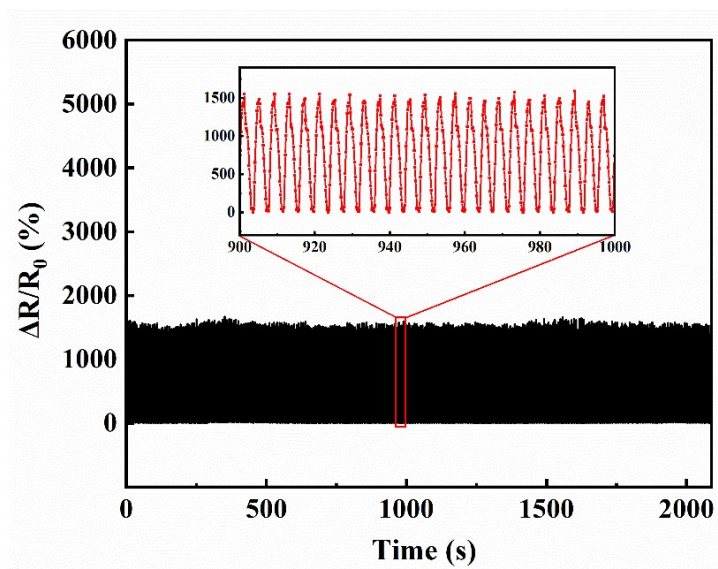

Fig. S5  $\Delta R/R_0$  on the loading-unloading cycles at a constant strain of 20%. Inset: representative magnified cycles of 900-1,000 s in the marker region.

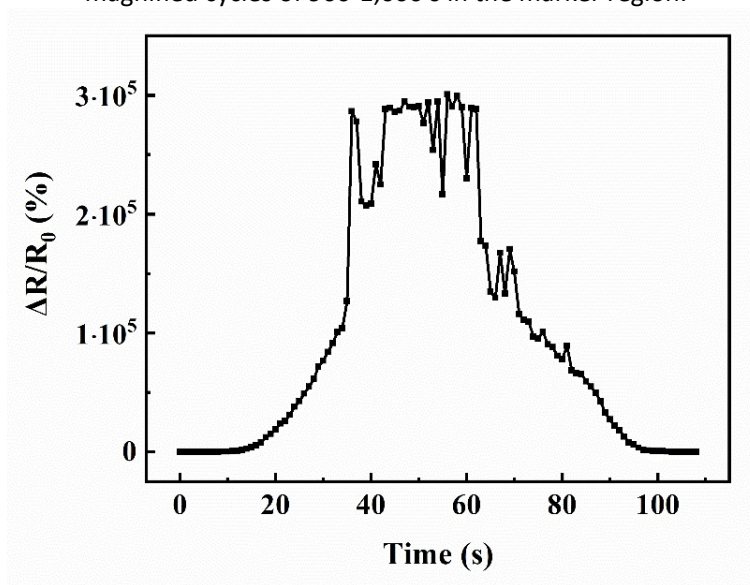

Fig. S6 The sensor resistance variation at overstretch (95%).
